# Supplementary material for: A diphosphoramidite ligand for hydroformylation of various olefins
Source: Royal Society of Chemistry journal article supplement (doi:10.1039/d2cc05119b), 2023-01-01
Supplement: d2cc05119b1.pdf [file d2cc05119b1.pdf]

*Supporting Information for*

**A diphosphoramidite ligand for hydroformylation of various olefins**

Cheng Li,<sup>a</sup> Siqi Li,<sup>a</sup> Haoran Liang,<sup>\*a</sup> Haiyan Fu,<sup>\*b</sup> and Hua Chen<sup>b</sup>

<sup>a</sup> *Chongqing Key Lab of Medicinal Chemistry & Molecular Pharmacology, School of Pharmacy and Bioengineering, Chongqing University of Technology, Chongqing 400054, P. R. China*

<sup>b</sup> *Key Laboratory of Green Chemistry & Technology, Ministry of Education, College of Chemistry, Sichuan University, Chengdu 610064, P. R. China*

**Table of Contents**

|                                                                         |    |
|-------------------------------------------------------------------------|----|
| 1. General Information.....                                             | 1  |
| 2. Preparation and Spectral Data of Ligand.....                         | 1  |
| 3. Preparation and Spectral Data of Crotonaldehyde Ethylene Acetal..... | 5  |
| 4. General Information for the Hydroformylation Reaction.....           | 6  |
| 5. Optimization for Hydroformylation of Olefins.....                    | 6  |
| 6. GC and GC-MS Results of Hydroformylation Reactions.....              | 8  |
| 7. Comparison with Relevant Literature.....                             | 14 |
| 8. DFT Calculation Results for Ligand.....                              | 15 |
| 9. DFT Calculation Results for Styrene Hydroformylation.....            | 19 |
| 10. Reference.....                                                      | 24 |

## 1. General Information

Unless otherwise stated, commercial reagents were used without purification. All manipulations of air- and moisture-sensitive reagents were performed under an inert atmosphere of argon in either a vacuum atmosphere or using standard Schlenk techniques.  $^1\text{H}$ ,  $^{13}\text{C}$  and  $^{31}\text{P}$  NMR spectra were recorded on Bruker AVANCE III HD-400 MHz NMR spectrometers. Multiplets were assigned as s (singlet), d (doublet), t (triplet), and m (multiplet). High resolution mass spectra (HRMS) were recorded with a Shimadzu LCMS-IT-TOF high resolution liquid chromatograph. GC analysis was performed on an Agilent 8860 chromatograph (KB-5, 30m\*320um\*0.25um, FID). GC conditions: 70 °C for 5 min, then 290 °C for 12 min (rate 15 °C/min). GC-MS analysis was conducted on a SHIMADZU GCMS-QP2010SE (KB-5MS, 30 m\*0.25 mm\*0.25  $\mu\text{m}$ ). Melting points were obtained by X-4B micro Melting Point Measurement Instrument.

## 2. Preparation and Spectral Data of Ligand

The ligand backbone 1,1'-bis-(6,7,8,9-tetrahydro-2-hydroxy-dibenzofuran) was prepared based on the literature.<sup>1</sup>

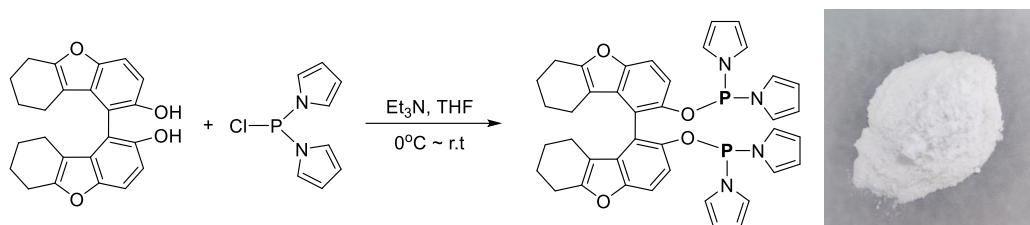

A solution of pyrrole (6.9 mL, 100 mmol) in THF (20 mL) was added dropwise to a solution of phosphorus trichloride (4.4 mL, 50 mmol) and triethylamine (20 mL, 144 mmol) in THF (100 mL) at 0 °C under argon atmosphere. A white precipitate generated immediately upon addition. The reaction mixture was stirred overnight at room temperature. The reaction mixture was used directly in the next reaction. A solution of 1,1'-bis-(6,7,8,9-tetrahydro-2-hydroxy-dibenzofuran) (4.49 g, 12 mmol) in THF (30 mL) was added dropwise to a former solution of chlorodipyrrolylphosphine and another of triethylamine (10 mL, 72 mmol) at 0 °C under argon atmosphere. The reaction mixture was stirred overnight at room temperature. The triethylamine•HCl salts were filtered off at room temperature once the reaction was accomplished. The solvent was subsequently removed under diminished pressure, and the residue was purified via recrystallization with ethanol to obtain desired compound as a white solid (5.66 g, 67.6%).

M.p.: 132-134 °C.

HRMS (ESI+): calcd for  $\text{C}_{40}\text{H}_{36}\text{N}_4\text{O}_4\text{P}_2$ : 698.2212; found: 699.2128.

$^1\text{H}$  NMR (400 MHz,  $\text{CDCl}_3$ )  $\delta$  7.28 (d,  $J = 8.7$  Hz, 2H), 6.75 (d,  $J = 8.7$  Hz, 2H), 6.63 – 6.55 (m, 8H), 6.19 – 6.10 (m, 8H), 2.66 (t,  $J = 6.0$  Hz, 4H), 1.89 – 1.64 (m, 8H), 1.56 – 1.45 (m, 4H) ppm.

$^{13}\text{C}$  NMR (101 MHz,  $\text{CDCl}_3$ )  $\delta$  156.02, 150.60, 146.74, 129.88, 121.09, 118.42, 114.29, 113.64, 111.92, 111.00, 23.61, 22.53, 22.37, 20.53 ppm.

$^{31}\text{P}$  NMR (162 MHz,  $\text{CDCl}_3$ )  $\delta$  109.39 ppm.

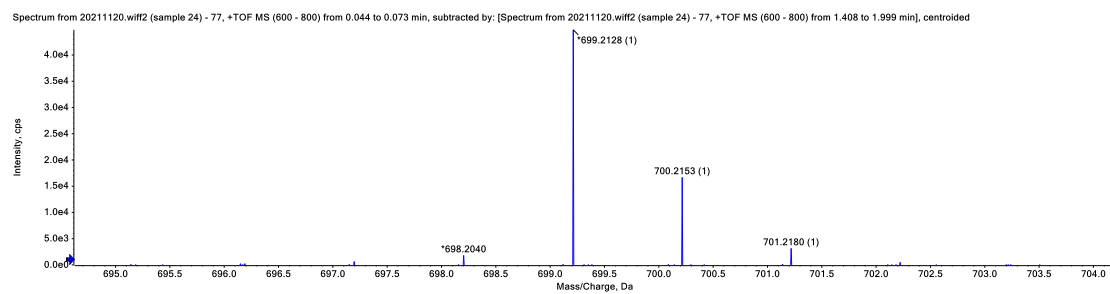

**Figure S1.** HRMS(ESI<sup>+</sup>) spectra of pyTFBP

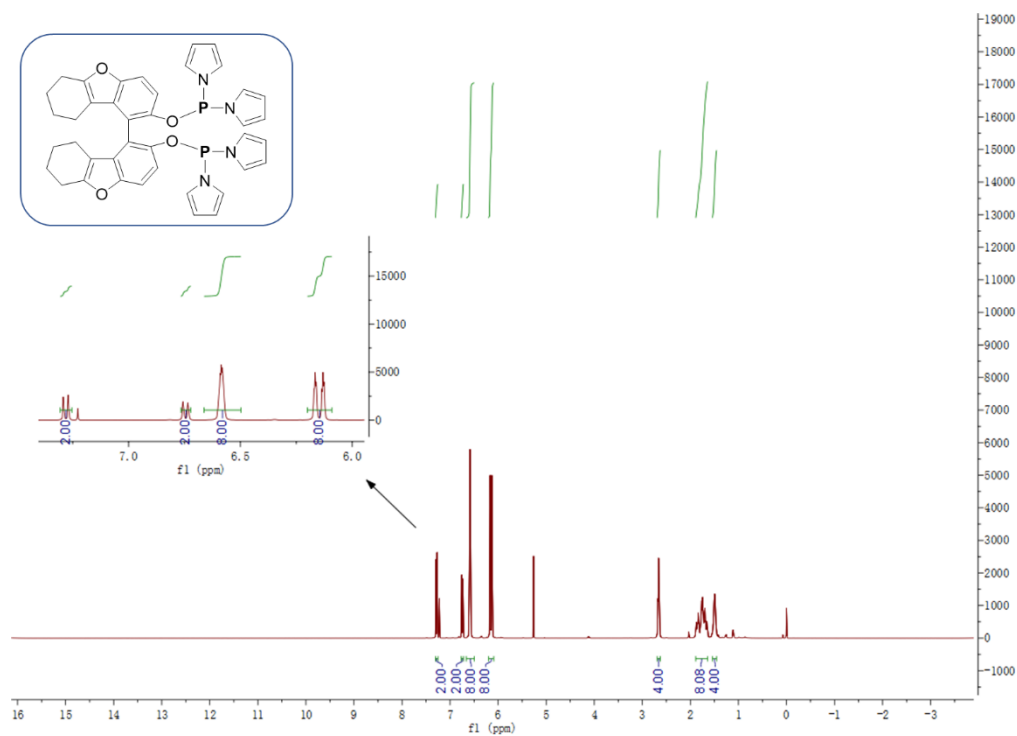

**Figure S2.** <sup>1</sup>H NMR spectra of pyTFBP in CDCl<sub>3</sub>

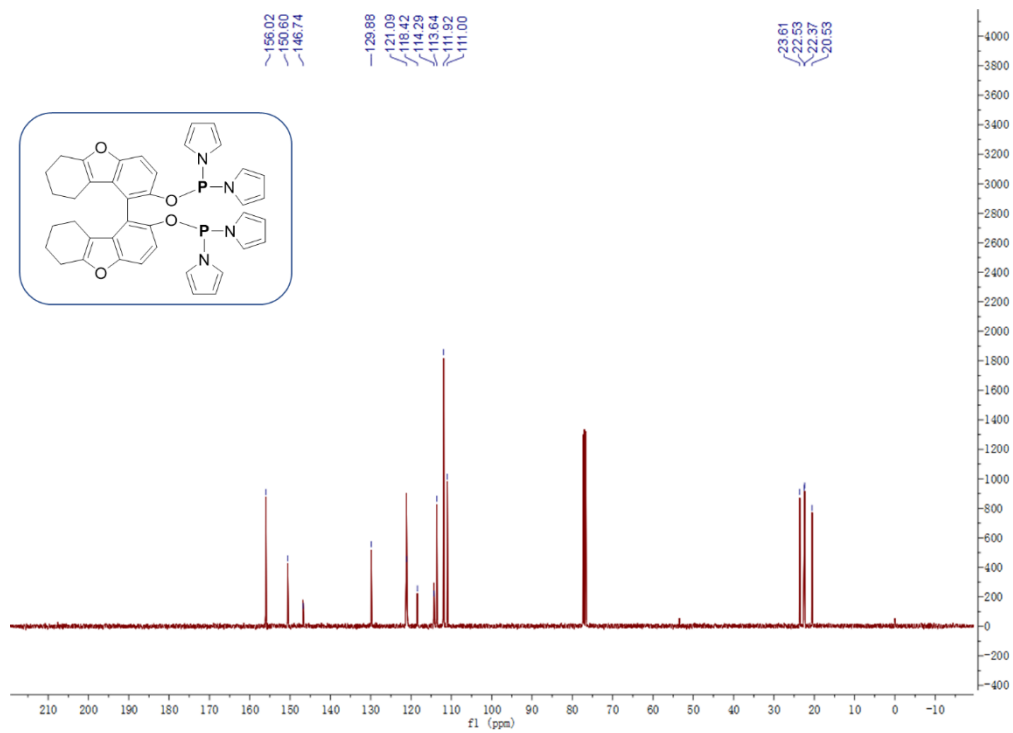

**Figure S3.** <sup>13</sup>C NMR spectra of pyTFBP in CDCl<sub>3</sub>

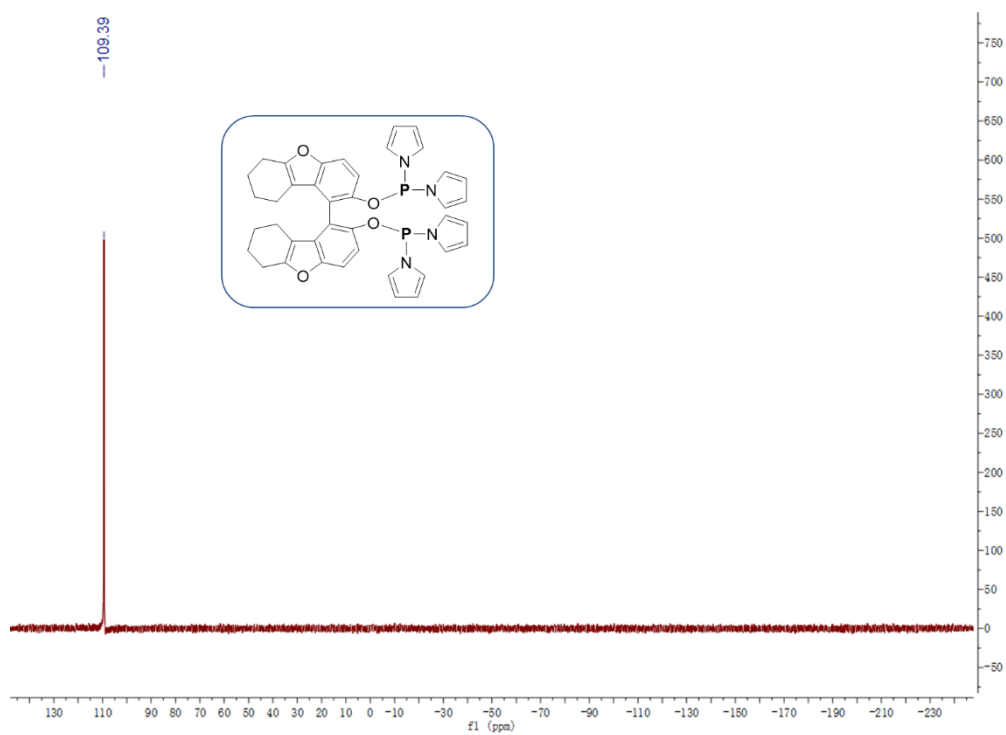

**Figure S4.** <sup>31</sup>P NMR spectra of pyTFBP in CDCl<sub>3</sub>

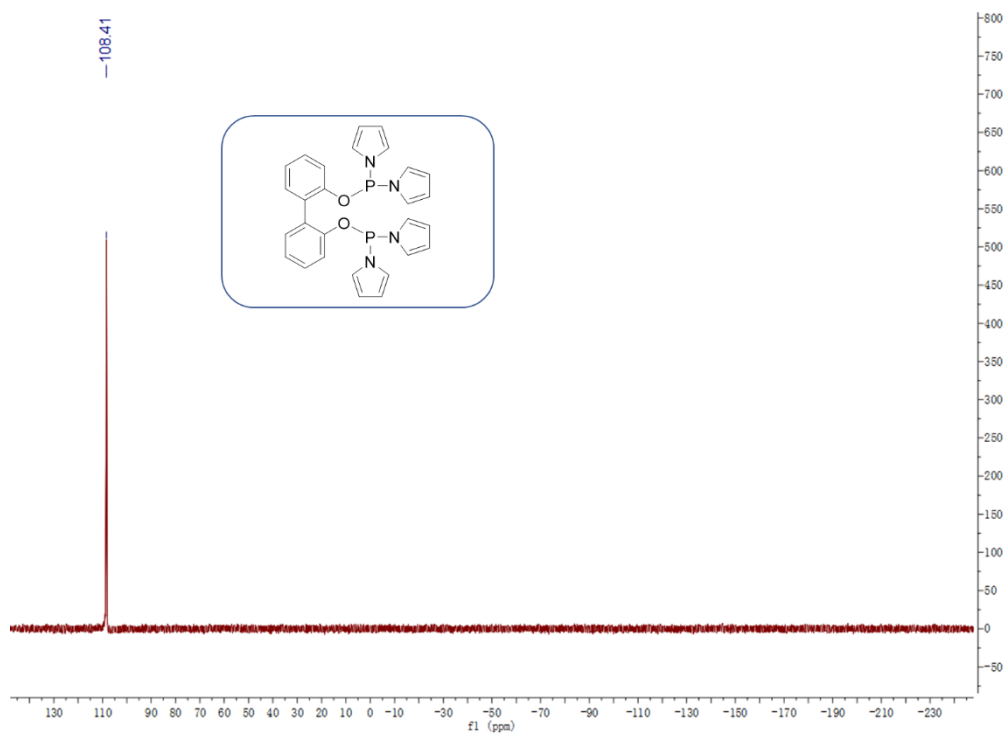

**Figure S5.**  $^{31}\text{P}$  NMR spectra of pyBP in  $\text{CDCl}_3$

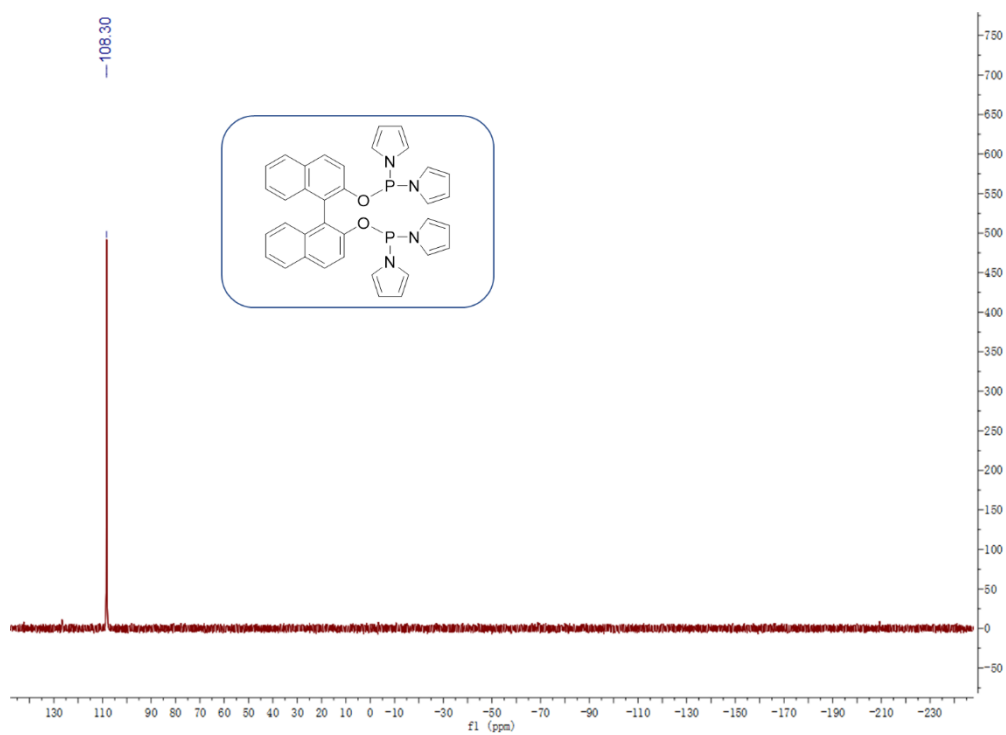

**Figure S6.**  $^{31}\text{P}$  NMR spectra of pyBN in  $\text{CDCl}_3$

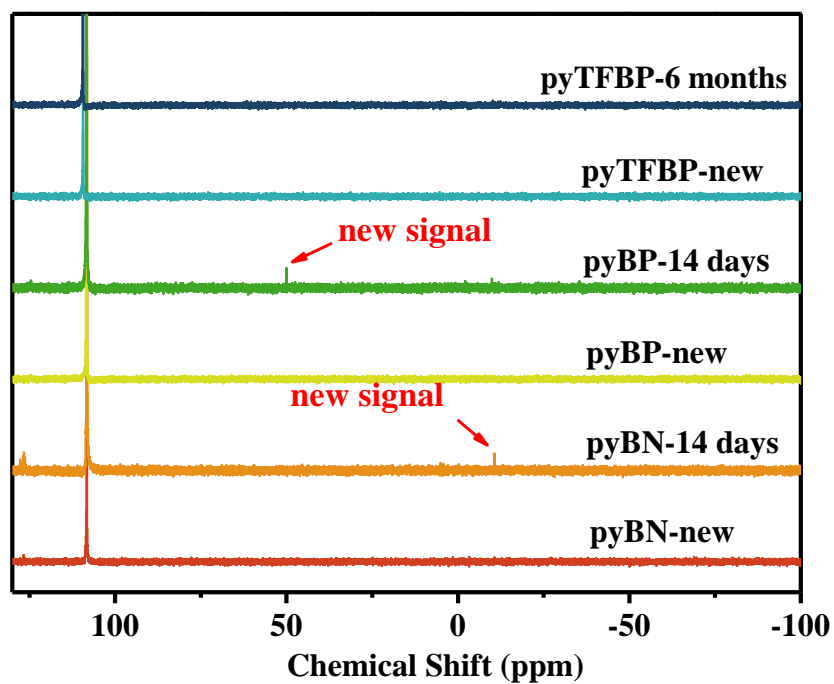

Figure S7. Comparison of the  $^{31}\text{P}$  NMR spectra

### 3. Preparation and Spectral Data of Crotonaldehyde Ethylene Acetal

Crotonaldehyde ethylene acetal was prepared based on the literature.<sup>2</sup> The anticipated structure has been confirmed by GC-MS and  $^1\text{H}$  NMR spectra, which is consistent with the literature.

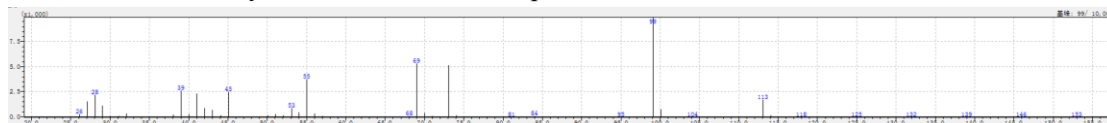

Figure S8. GC-MS of crotonaldehyde ethylene acetal

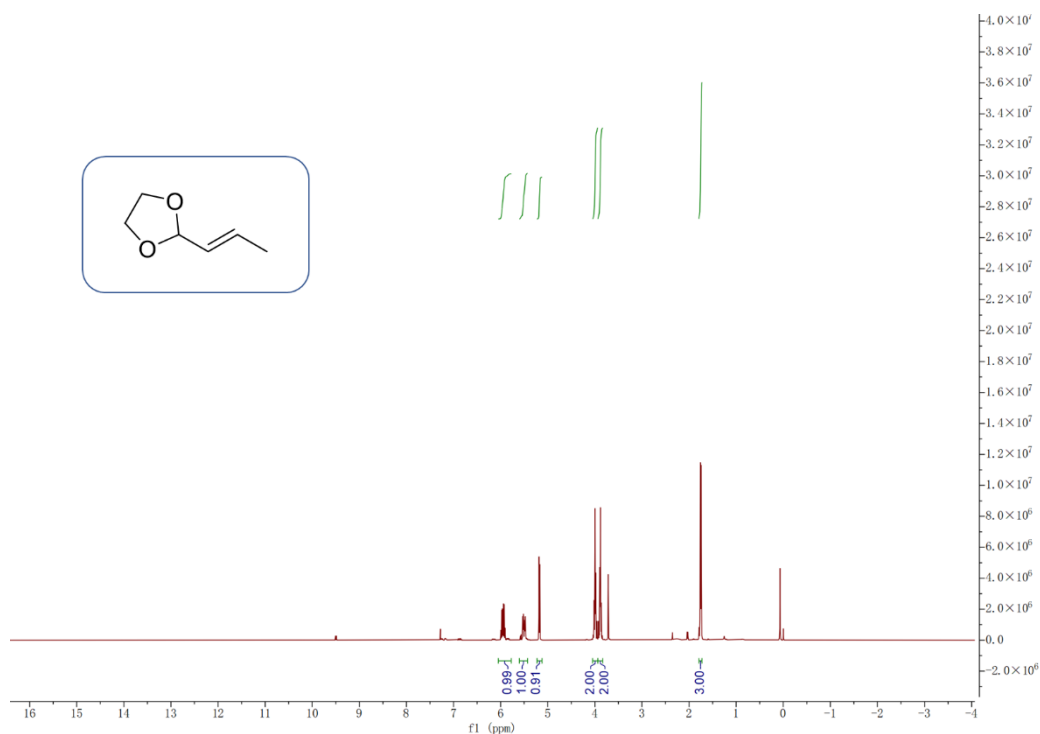

Figure S9.  $^1\text{H}$  NMR spectra of crotonaldehyde ethylene acetal in  $\text{CDCl}_3$

#### 4. General Information for the Hydroformylation Reaction

The hydroformylation reaction was conducted in a 25 mL or 50 mL high-pressure autoclave. In a typical run, precatalyst, ligand and substrate were loaded. And then the reactor was purged with syngas, and charged with high-pressure syngas. The reactor was heated to the desired temperature with stirring. After the reaction time, the autoclave was cooled quickly in an ice-water bath, and then vented slowly. The reaction products were determined by GC-MS and quantified by GC.

#### 5. Optimization for Hydroformylation of Olefins

**Table S1.** Optimization for hydroformylation of 2-pentene<sup>a</sup>

| Entry | T[°C] | L/Rh | CO/H <sub>2</sub> [MPa] | TON <sup>b</sup> | Sel. <sub>CHO</sub> <sup>c</sup> [%] | Linear <sup>d</sup> [%] | l/b <sup>e</sup> |
|-------|-------|------|-------------------------|------------------|--------------------------------------|-------------------------|------------------|
| 1     | 100   | 1    | 1.0                     | 392              | 93.1                                 | 43.1                    | 0.8              |
| 2     | 100   | 2    | 1.0                     | 781              | 98.2                                 | 79.8                    | 3.9              |
| 3     | 100   | 3    | 1.0                     | 983              | 94.6                                 | 91.5                    | 10.7             |
| 4     | 100   | 4    | 1.0                     | 984              | 94.7                                 | 96.4                    | 26.7             |
| 5     | 100   | 5    | 1.0                     | 988              | 94.4                                 | 96.2                    | 25.0             |
| 6     | 80    | 4    | 1.0                     | 785              | 99.3                                 | 97.0                    | 32.4             |
| 7     | 90    | 4    | 1.0                     | 897              | 98.5                                 | 97.0                    | 32.8             |
| 8     | 90    | 4    | 0.5                     | 877              | 97.6                                 | 97.0                    | 32.2             |
| 9     | 90    | 4    | 2.0                     | 938              | 97.8                                 | 97.1                    | 33.3             |

<sup>a</sup> Reaction conditions: S/C=1000, 2-pentene (14.6 mmol), [Rh(CO)<sub>2</sub>(acac)](2.9 mM in xylene, 5.0 mL), 2 h, decane (0.2 mL) as internal standard. <sup>b</sup> Turnover number, determined on the basis of alkene conversion by GC analysis. <sup>c</sup> Percentage of aldehyde in all products. <sup>d</sup> Percentage of linear aldehyde in all aldehydes. <sup>e</sup> Linear/branched ratio.

**Table S2.** Optimization for hydroformylation of 2-octene<sup>a</sup>

| Entry           | T[°C] | L/Rh | CO/H <sub>2</sub> [MPa] | TON <sup>b</sup> | Sel. <sub>CHO</sub> <sup>c</sup> [%] | Linear <sup>d</sup> [%] | l/b <sup>e</sup> |
|-----------------|-------|------|-------------------------|------------------|--------------------------------------|-------------------------|------------------|
| 1               | 90    | 2    | 1.0                     | 809              | 60.2                                 | 51.3                    | 1.1              |
| 2               | 90    | 3    | 1.0                     | 827              | 60.3                                 | 85.0                    | 5.7              |
| 3               | 90    | 4    | 1.0                     | 852              | 63.1                                 | 98.4                    | 63               |
| 4               | 90    | 5    | 1.0                     | 845              | 64.0                                 | 98.1                    | 52.5             |
| 5               | 80    | 4    | 1.0                     | 714              | 63.8                                 | 98.7                    | 78.7             |
| 6               | 100   | 4    | 1.0                     | 895              | 70.6                                 | 98.0                    | 48.9             |
| 7               | 110   | 4    | 1.0                     | 905              | 70.8                                 | 96.9                    | 31.2             |
| 8               | 100   | 4    | 0.5                     | 830              | 57.6                                 | 97.8                    | 44.8             |
| 9               | 100   | 4    | 2.0                     | 930              | 77.4                                 | 98.1                    | 51.3             |
| 10              | 100   | 4    | 3.0                     | 934              | 77.8                                 | 97.2                    | 34.9             |
| 11 <sup>f</sup> | 100   | 24   | 2.0                     | 8360             | 62.4                                 | 97.8                    | 44.0             |

<sup>a</sup> Reaction conditions: S/C=1000, 2-octene (14.6 mmol), [Rh(CO)<sub>2</sub>(acac)](2.9 mM in toluene, 5.0 mL), 2 h, decane (0.2 mL) as internal standard. <sup>b-e</sup> See Table S1. <sup>f</sup> S/C=10000.

**Table S3.** Optimization for hydroformylation of methyl acrylate<sup>a</sup>

| Entry | T[°C] | L/Rh | CO/H <sub>2</sub> [MPa] | TON <sup>b</sup> | Sel. <sub>CHO</sub> <sup>c</sup> [%] | Linear <sup>d</sup> [%] | l/b <sup>e</sup> |
|-------|-------|------|-------------------------|------------------|--------------------------------------|-------------------------|------------------|
| 1     | 100   | 1    | 1.0                     | 11280            | 83.8                                 | 93.9                    | 15.3             |
| 2     | 100   | 2    | 1.0                     | 14460            | 83.2                                 | 94.7                    | 17.8             |
| 3     | 100   | 3    | 1.0                     | 15580            | 84.0                                 | 95.9                    | 23.4             |
| 4     | 100   | 4    | 1.0                     | 14340            | 81.0                                 | 93.7                    | 14.9             |
| 5     | 60    | 3    | 1.0                     | 12800            | 51.5                                 | 51.2                    | 1.1              |
| 6     | 80    | 3    | 1.0                     | 17840            | 68.0                                 | 80.4                    | 4.1              |
| 7     | 120   | 3    | 1.0                     | 13300            | 71.9                                 | 96.2                    | 25.6             |
| 8     | 100   | 3    | 0.5                     | 11800            | 82.8                                 | 96.7                    | 29.7             |
| 9     | 100   | 3    | 2.0                     | 17780            | 66.1                                 | 83.5                    | 5.0              |

<sup>a</sup> Reaction conditions: S/C=20000, methyl acrylate (100 mmol), [Rh(CO)<sub>2</sub>(acac)](1.0 mM in toluene, 5.0 mL), 2 h,

decane (0.2mL) as internal standard. <sup>b-e</sup> See Table S1.

**Table S4.** Optimization for hydroformylation of allyl acetate<sup>a</sup>

| Entry | T[°C] | L/Rh | CO/H <sub>2</sub> [MPa] | TON <sup>b</sup> | Sel. <sub>CHO</sub> <sup>c</sup> [%] | Linear <sup>d</sup> [%] | <i>l/b</i> <sup>e</sup> |
|-------|-------|------|-------------------------|------------------|--------------------------------------|-------------------------|-------------------------|
| 1     | 100   | 3    | 1.0                     | 5440             | 85.5                                 | 82.5                    | 4.7                     |
| 2     | 100   | 4    | 1.0                     | 8810             | 87.8                                 | 85.1                    | 5.7                     |
| 3     | 100   | 5    | 1.0                     | 9250             | 88.1                                 | 87.5                    | 7.0                     |
| 4     | 100   | 6    | 1.0                     | 9290             | 96.7                                 | 80.5                    | 4.1                     |
| 5     | 100   | 7    | 1.0                     | 8710             | 93.3                                 | 75.8                    | 3.1                     |
| 6     | 60    | 5    | 1.0                     | 9660             | 97.4                                 | 75.4                    | 3.1                     |
| 7     | 80    | 5    | 1.0                     | 9740             | 98.9                                 | 86.2                    | 6.3                     |
| 8     | 120   | 5    | 1.0                     | 7420             | 71.3                                 | 87.7                    | 7.1                     |
| 9     | 80    | 5    | 0.5                     | 8530             | 94.5                                 | 85.8                    | 6.0                     |
| 10    | 80    | 5    | 2.0                     | 9860             | 98.2                                 | 79.9                    | 4.0                     |

<sup>a</sup> Reaction conditions: S/C=10000, allyl acetate (146 mmol), [Rh(CO)<sub>2</sub>(acac)](2.9 mM in toluene, 5.0 mL), 2 h, dodecane (0.2mL) as internal standard. <sup>b-e</sup> See Table S1.

**Table S5.** Optimization for hydroformylation of crotonaldehyde ethylene acetal<sup>a</sup>

| Entry | T[°C] | L/Rh | CO/H <sub>2</sub> [MPa] | TON <sup>b</sup> | Sel. <sub>CHO</sub> <sup>c</sup> [%] | Linear <sup>d</sup> [%] | <i>l/b</i> <sup>e</sup> |
|-------|-------|------|-------------------------|------------------|--------------------------------------|-------------------------|-------------------------|
| 1     | 100   | 4    | 1.0                     | 1172             | 95.9                                 | 89.3                    | 8.3                     |
| 2     | 100   | 5    | 1.0                     | 1266             | 94.9                                 | 90.6                    | 9.6                     |
| 3     | 100   | 6    | 1.0                     | 1338             | 95.1                                 | 91.7                    | 11.0                    |
| 4     | 100   | 7    | 1.0                     | 1752             | 96.8                                 | 93.9                    | 15.4                    |
| 5     | 100   | 8    | 1.0                     | 1864             | 96.9                                 | 95.1                    | 19.4                    |
| 6     | 80    | 8    | 1.0                     | 720              | 94.1                                 | 87.1                    | 6.7                     |
| 7     | 120   | 8    | 1.0                     | 1866             | 94.4                                 | 93.9                    | 15.4                    |
| 8     | 100   | 8    | 2.0                     | 1464             | 87.0                                 | 85.2                    | 5.8                     |
| 9     | 100   | 8    | 0.5                     | 1766             | 96.1                                 | 95.7                    | 22.3                    |

<sup>a</sup> Reaction conditions: S/C=2000, crotonaldehyde ethylene acetal (29.2 mmol), [Rh(CO)<sub>2</sub>(acac)](2.9 mM in toluene, 5.0 mL), 1 h, decane (0.2mL) as internal standard. <sup>b-e</sup> See Table S1.

**Table S6.** Optimization for hydroformylation of styrene<sup>a</sup>

| Entry          | T[°C] | L/Rh | CO/H <sub>2</sub> [MPa] | TON <sup>b</sup> | Sel. <sub>CHO</sub> <sup>c</sup> [%] | Linear <sup>d</sup> [%] | <i>l/b</i> <sup>e</sup> |
|----------------|-------|------|-------------------------|------------------|--------------------------------------|-------------------------|-------------------------|
| 1              | 80    | 1    | 2.0                     | 10660            | 96.6                                 | 63.7                    | 1.8                     |
| 2              | 80    | 2    | 2.0                     | 11800            | 98.7                                 | 63.6                    | 1.7                     |
| 3              | 80    | 3    | 2.0                     | 18640            | 99.9                                 | 82.7                    | 4.8                     |
| 4              | 80    | 4    | 2.0                     | 18060            | 99.8                                 | 83.5                    | 5.1                     |
| 5              | 80    | 3    | 1.0                     | 18660            | 96.9                                 | 85.7                    | 6.0                     |
| 6              | 80    | 3    | 0.5                     | 13120            | 96.3                                 | 87.0                    | 6.7                     |
| 7              | 100   | 3    | 1.0                     | 19900            | 95.8                                 | 85.9                    | 6.1                     |
| 8              | 120   | 3    | 1.0                     | 18420            | 89.3                                 | 84.6                    | 5.5                     |
| 9 <sup>f</sup> | 100   | 3    | 1.0                     | 38200            | 95.5                                 | 85.8                    | 6.1                     |

<sup>a</sup> Reaction conditions: S/C=20000, styrene (100 mmol), [Rh(CO)<sub>2</sub>(acac)](1.0 mM in toluene, 5.0 mL), 1 h, decane (0.2mL) as internal standard. <sup>b-e</sup> See Table S1. <sup>f</sup> S/C = 40000.



## 6. GC and GC-MS Results of Hydroformylation Reactions

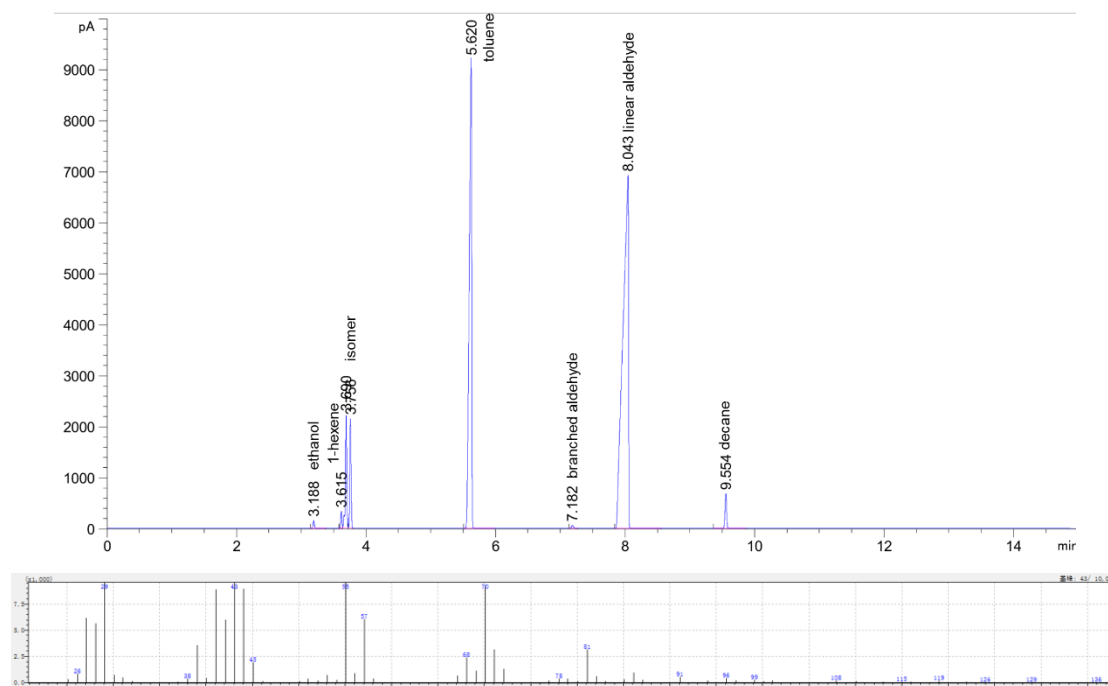

Figure S10. GC of 1-hexene hydroformylation and GC-MS of 1-heptaldehyde

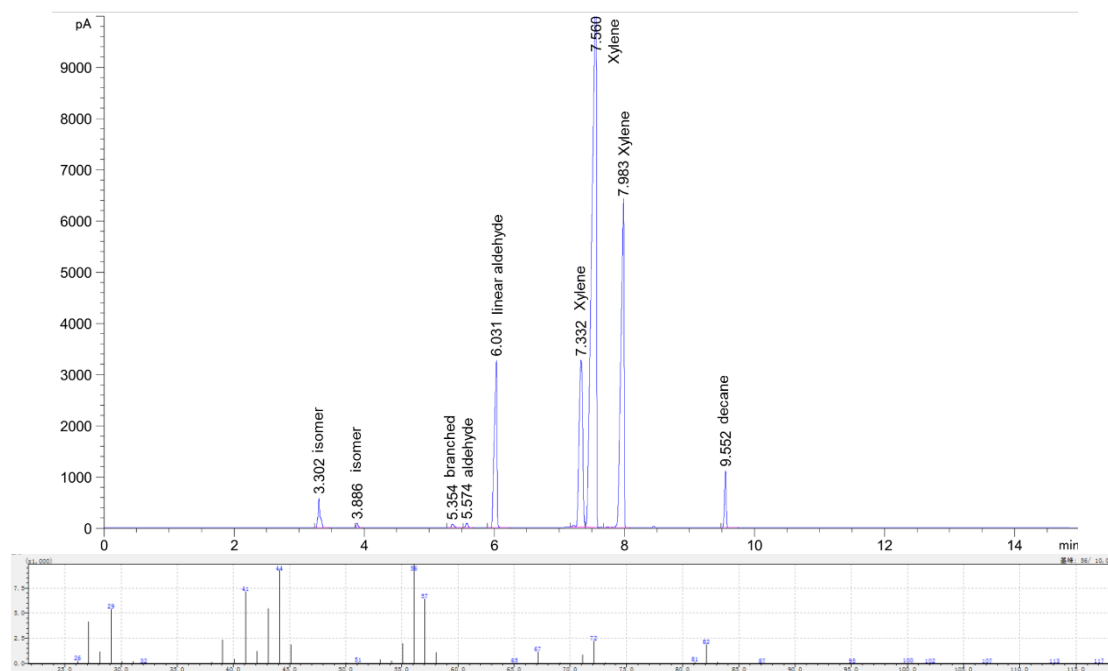

Figure S11. GC of 2-pentene hydroformylation and GC-MS of 1-hexaldehyde

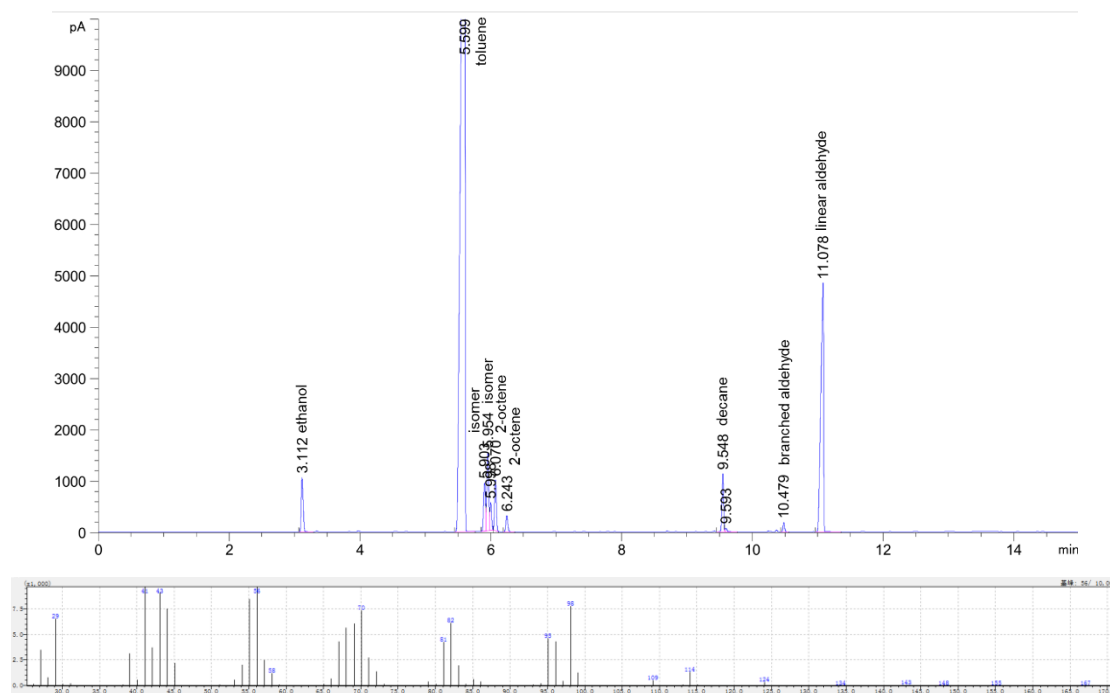

Figure S12. GC of 2-octene hydroformylation and GC-MS of 1-nonanaldehyde

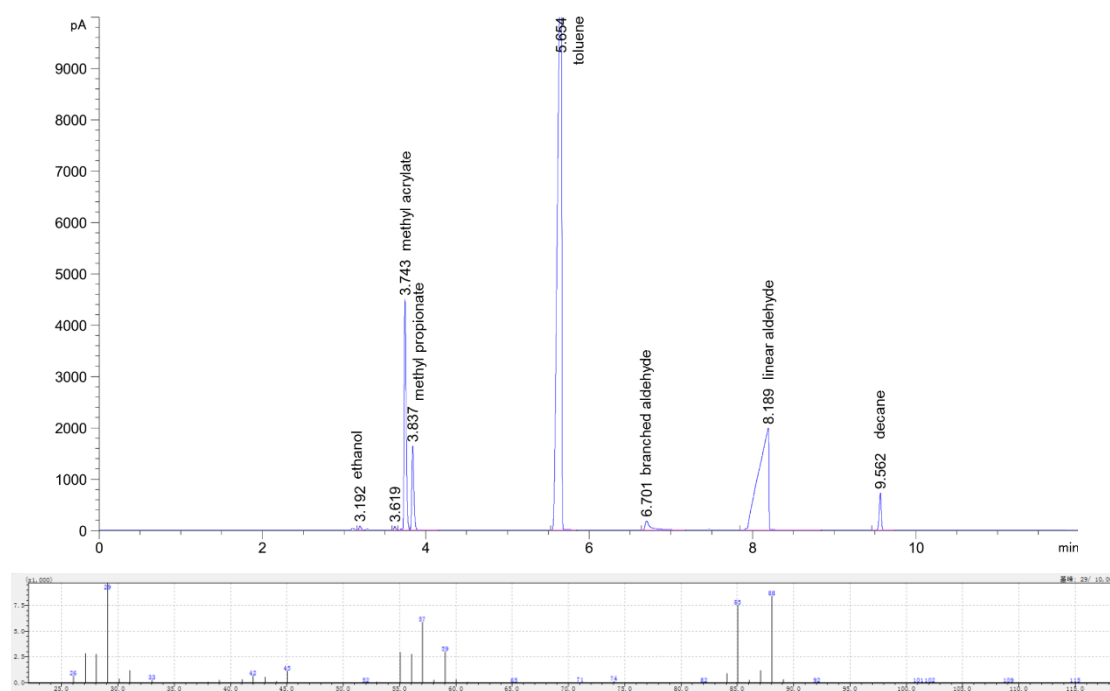

Figure S13. GC of methyl acrylate hydroformylation and GC-MS of corresponding linear aldehyde

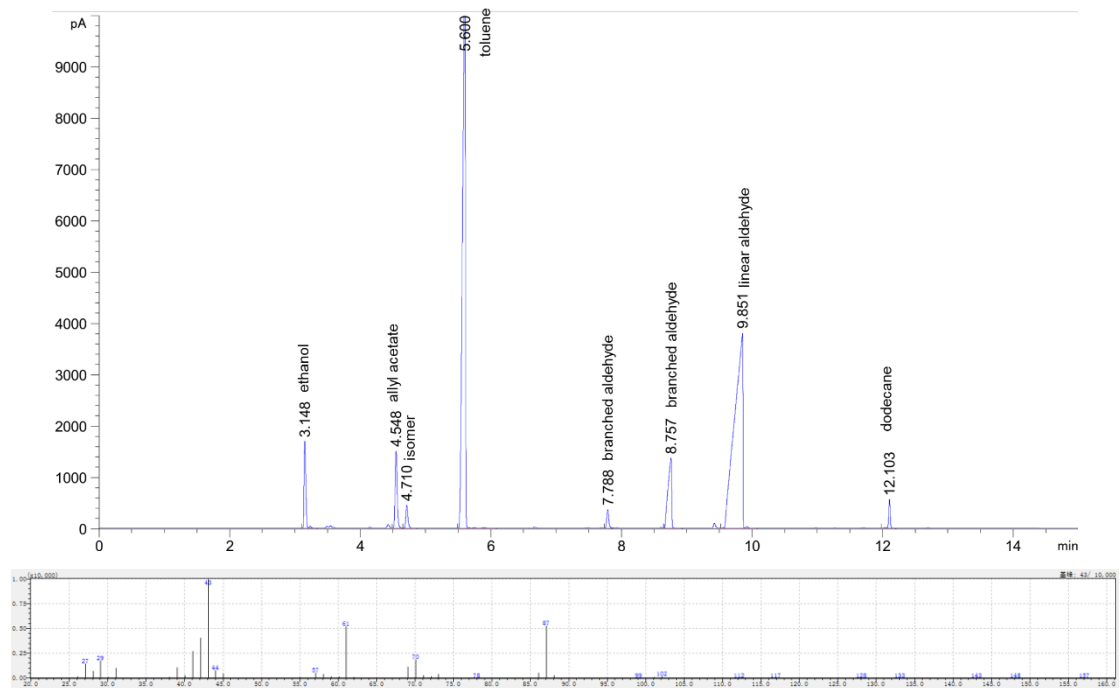

**Figure S14.** GC of allyl acetate hydroformylation and GC-MS of corresponding linear aldehyde

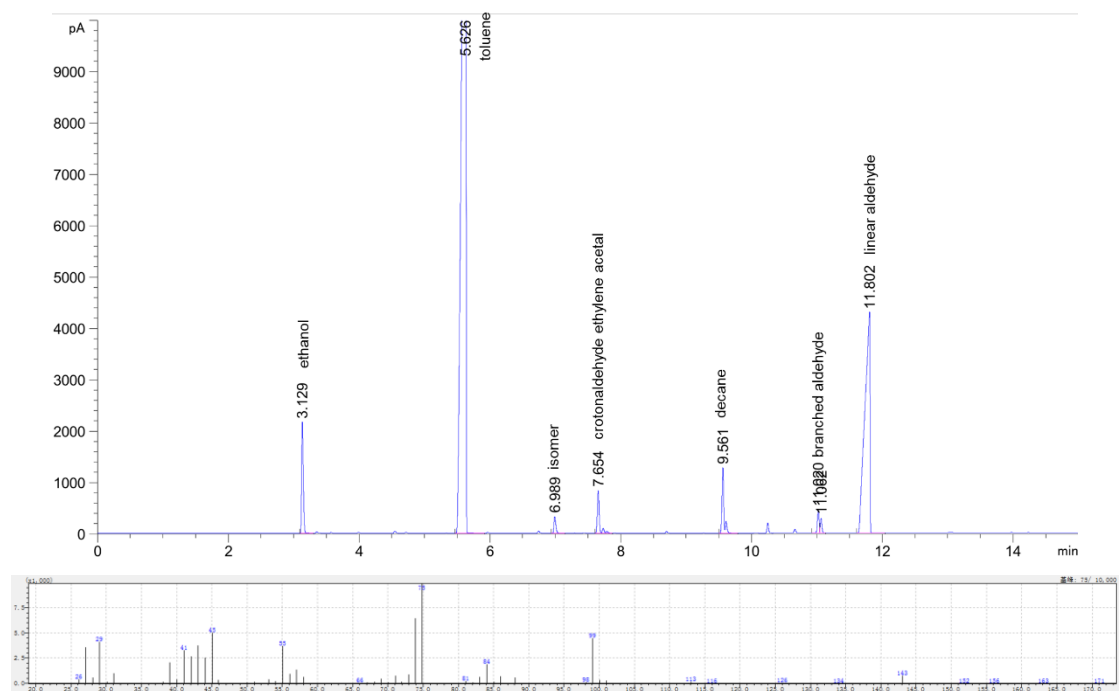

**Figure S15.** GC of crotonaldehyde ethylene acetal hydroformylation and GC-MS of corresponding linear aldehyde

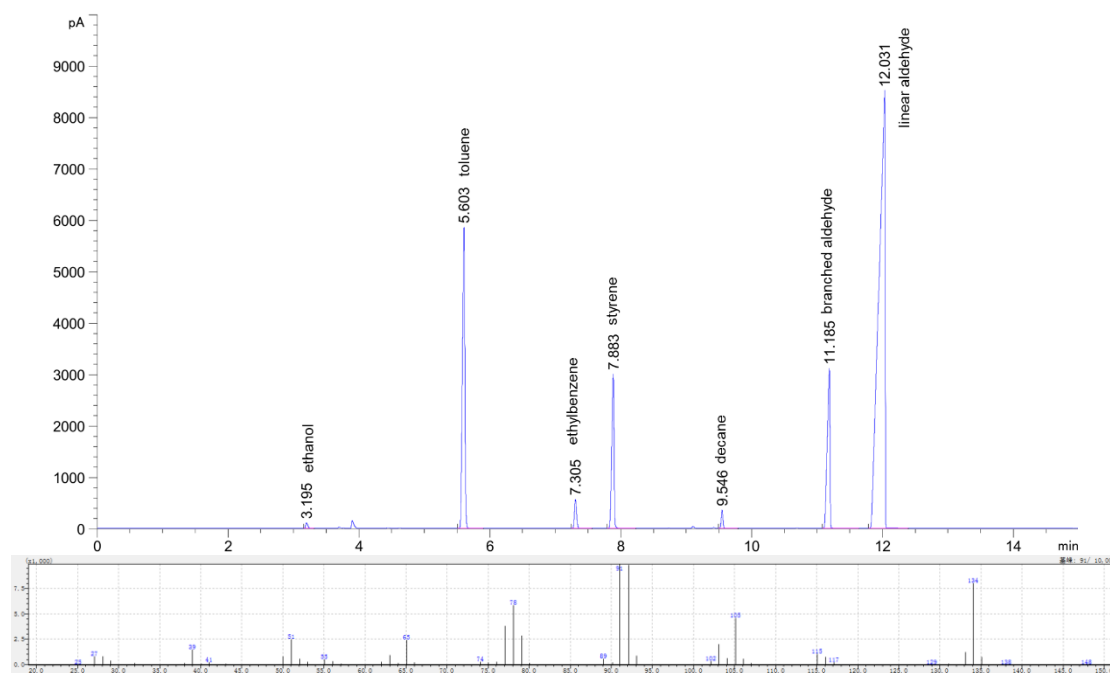

**Figure S16.** GC of styrene hydroformylation and GC-MS of corresponding linear aldehyde

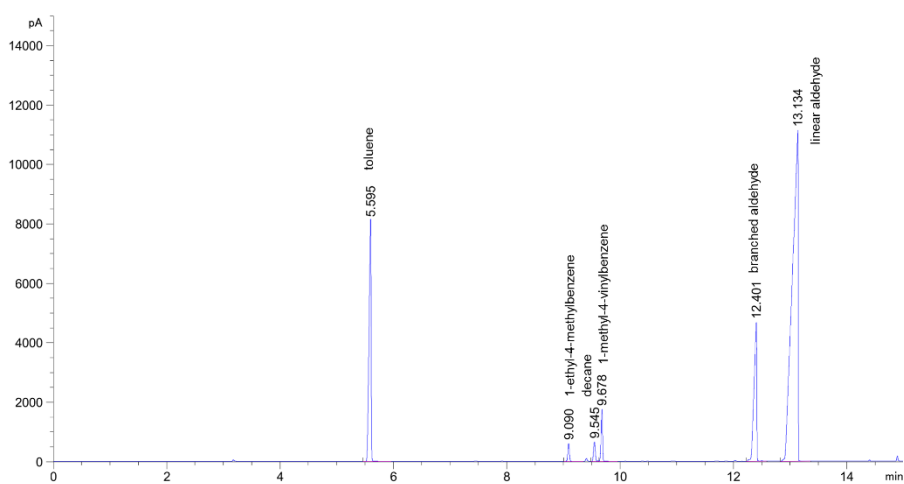

**Figure S17.** GC of 1-methyl-4-vinylbenzene hydroformylation

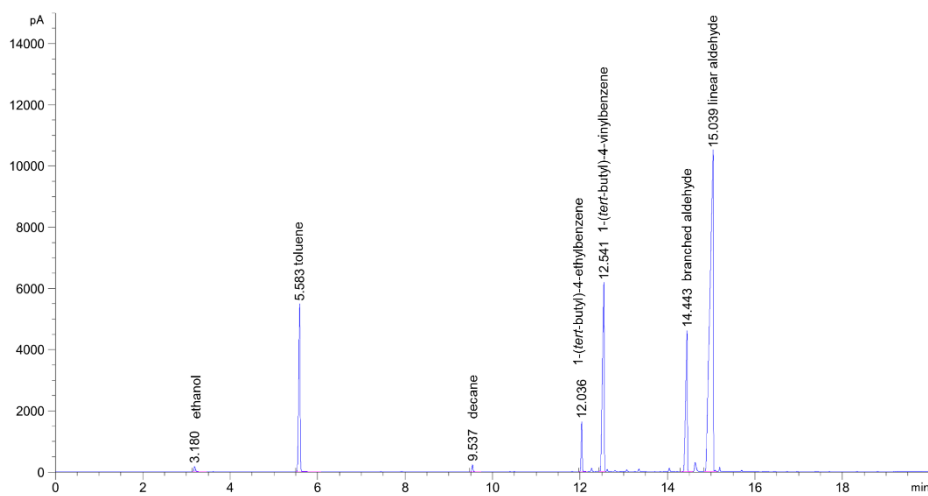

**Figure S18.** GC of 1-(*tert*-butyl)-4-vinylbenzene hydroformylation

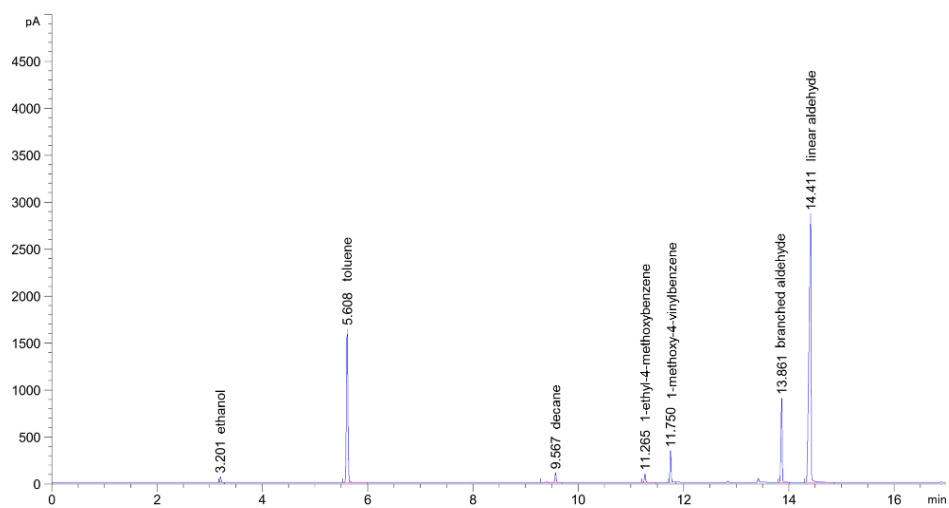

Figure S19. GC of 1-methoxy-4-vinylbenzene hydroformylation

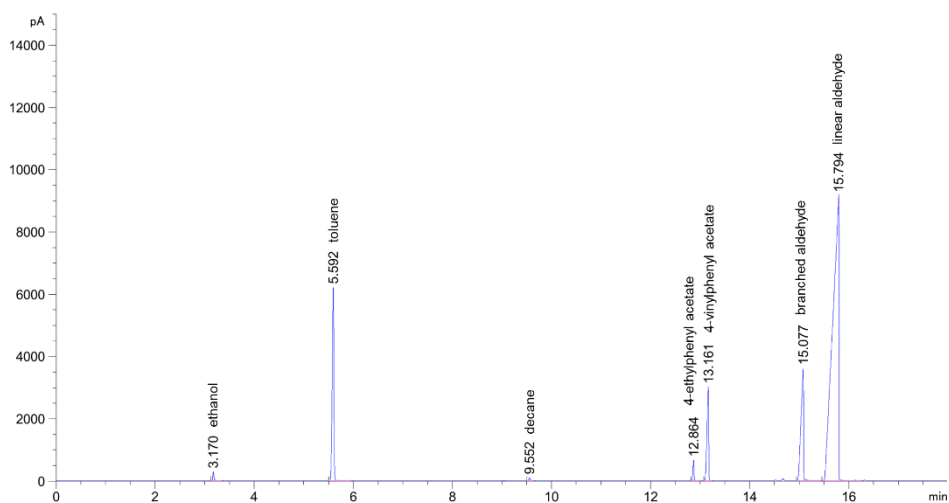

Figure S20. GC of 4-vinylphenyl acetate hydroformylation

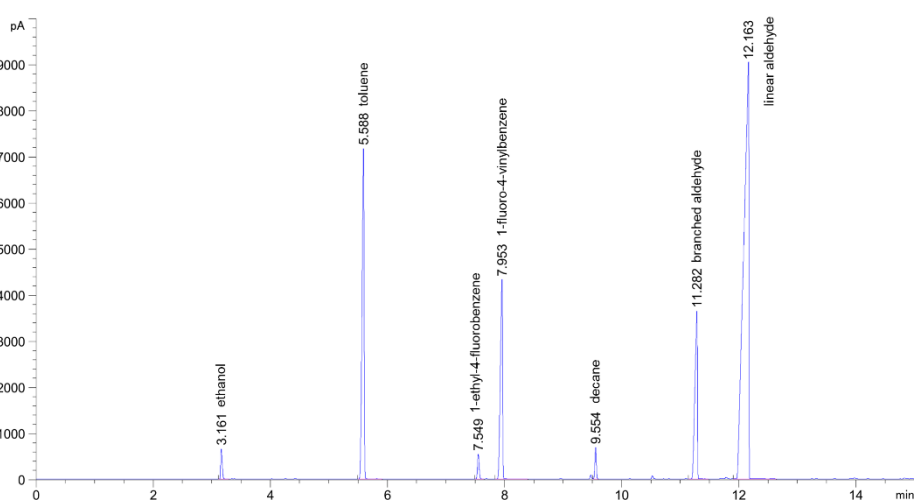

Figure S21. GC of 1-fluoro-4-vinylbenzene hydroformylation

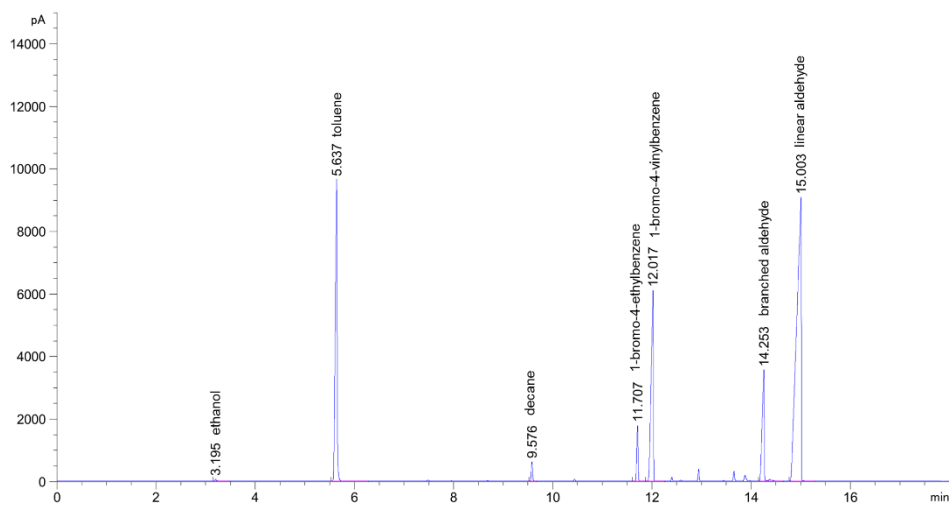

**Figure S22.** GC of 1-bromo-4-vinylbenzene hydroformylation

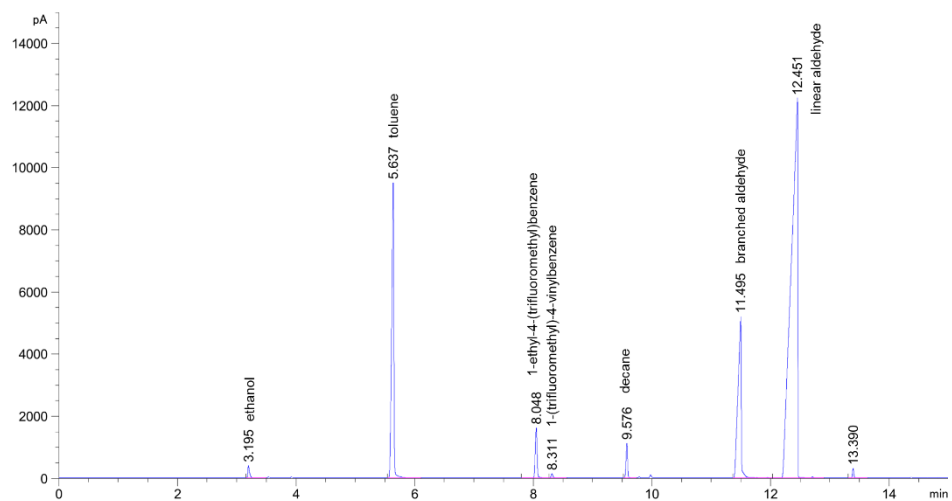

**Figure S23.** GC of 1-(trifluoromethyl)-4-vinylbenzene hydroformylation

## 7. Comparison with Relevant Literature

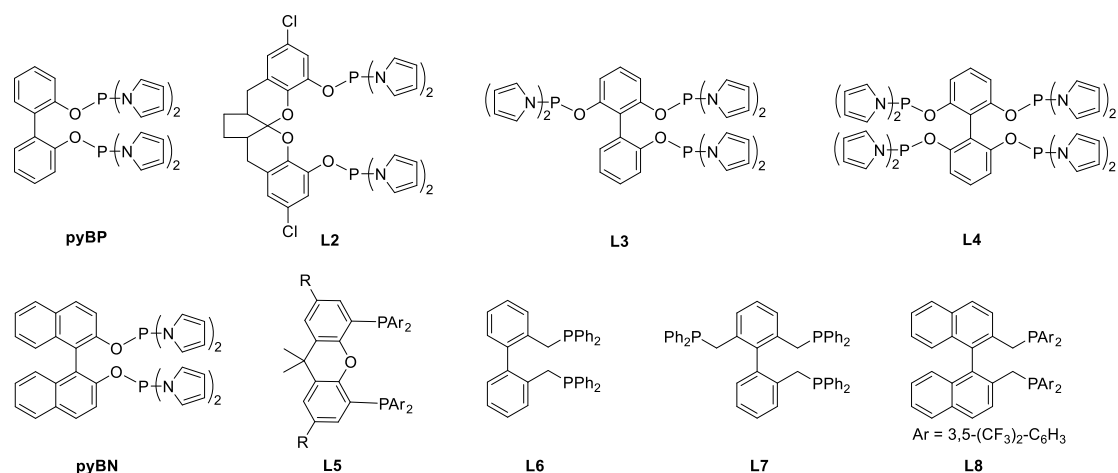

**Table S7** Comparison with relevant literature

| Substrate                                   | Ligand (Source)                                   | TON   | TOF (h <sup>-1</sup> ) | Sel. <sub>CHO</sub> (%) | Sel. <sub>ISO</sub> (%) | Linear (%) | <i>l/b</i>                                  | Reaction Condition                             |
|---------------------------------------------|---------------------------------------------------|-------|------------------------|-------------------------|-------------------------|------------|---------------------------------------------|------------------------------------------------|
| 1-hexene                                    | pyTFBP (This work)                                | 46700 | 23350                  | 86.1                    | 12.8                    | 99.8       | 403                                         | S/C = 50000, L/Rh = 2<br>2 MPa, 70 °C, 2 h     |
|                                             | pyBP <sup>3</sup> (Chem. Eur. J. 2012, 18, 15288) | 9000  | /                      | /                       | 8.7                     | 98.9       | 86.7                                        | S/C = 10000, L/Rh = 2<br>4 MPa, 100 °C, 3 h    |
|                                             | L2 <sup>3</sup> (Chem. Eur. J. 2012, 18, 15288)   | 7800  | /                      | /                       | 18                      | 99.4       | 174.4                                       | S/C = 10000, L/Rh = 2<br>4 MPa, 100 °C, 3 h    |
|                                             | L3 <sup>4</sup> (Org. Lett. 2013, 15, 1048)       | 7400  | /                      | /                       | 22.3                    | 99.8       | 471                                         | S/C = 10000, L/Rh = 3<br>1 MPa, 80 °C, 2 h     |
|                                             | L4 <sup>4</sup> (Org. Lett. 2013, 15, 1048)       | 7500  | /                      | /                       | 24.5                    | 99.8       | 618                                         | S/C = 10000, L/Rh = 3<br>1 MPa, 80 °C, 2 h     |
|                                             | L6 <sup>5</sup> (Org. Chem. Front. 2014, 1, 947)  | 9900  | /                      | /                       | 8.1                     | 97.9       | 47.5                                        | S/C = 10000, L/Rh = 4<br>1 MPa, 120 °C, 4 h    |
|                                             | L7 <sup>5</sup> (Org. Chem. Front. 2014, 1, 947)  | 9900  | /                      | /                       | 6.9                     | 98.5       | 66.8                                        | S/C = 10000, L/Rh = 4<br>1 MPa, 120 °C, 4 h    |
| 2-octene                                    | pyTFBP (This work)                                | 930   | 465                    | 77.4                    | 15.4                    | 98.1       | 51.3                                        | S/C = 1000, L/Rh = 4<br>2 MPa, 100 °C, 2 h     |
|                                             | pyTFBP (This work)                                | 8360  | 1672                   | 62.4                    | 26.2                    | 97.8       | 44.0                                        | S/C = 10000, L/Rh = 24<br>2 MPa, 100 °C, 5 h   |
|                                             | pyBP <sup>3</sup> (Chem. Eur. J. 2012, 18, 15288) | 6600  | /                      | /                       | /                       | 95.1       | 19.2                                        | S/C = 10000, L/Rh = 3<br>1.5 MPa, 110 °C, 15 h |
|                                             | pyBN <sup>6</sup> (Chem. Lett. 2009, 38, 596)     | 1126  | /                      | /                       | /                       | 97.5       | 39.5                                        | S/C = 1325, L/Rh = 1.5<br>0.7 MPa, 100 °C, 1 h |
|                                             | L2 <sup>3</sup> (Chem. Eur. J. 2012, 18, 15288)   | 4500  | /                      | /                       | /                       | 96.0       | 24.0                                        | S/C = 10000, L/Rh = 3<br>1.5 MPa, 110 °C, 15 h |
|                                             | L3 <sup>4</sup> (Org. Lett. 2013, 15, 1048)       | 2400  | /                      | /                       | /                       | 98.0       | 47                                          | S/C = 10000, L/Rh = 3<br>1 MPa, 100 °C, 2 h    |
| L4 <sup>4</sup> (Org. Lett. 2013, 15, 1048) | 2000                                              | /     | /                      | /                       | 98.3                    | 59         | S/C = 10000, L/Rh = 3<br>1 MPa, 100 °C, 2 h |                                                |
| L5 <sup>7</sup>                             | /                                                 | /     | 112                    | /                       | /                       | 90         | 9.5                                         | S/C = 637, L/Rh = 10                           |

|         |                                                                                           |       |       |      |   |      |     |                                             |
|---------|-------------------------------------------------------------------------------------------|-------|-------|------|---|------|-----|---------------------------------------------|
|         | ( <i>Adv. Synth. Catal.</i><br>2004, 346, 789)                                            |       |       |      |   |      |     | 0.36 MPa, 120 °C                            |
|         | <b>L6</b> <sup>5</sup><br>( <i>Org. Chem. Front.</i><br>2014, 1, 947)                     | 1400  | /     | /    | / | 84.5 | 5.5 | S/C = 2000, L/Rh = 4<br>0.5 MPa, 120 °C, 4h |
|         | <b>L7</b> <sup>5</sup><br>( <i>Org. Chem. Front.</i><br>2014, 1, 947)                     | 1400  | /     | /    | / | 87.4 | 7.0 | S/C = 2000, L/Rh = 4<br>0.5 MPa, 120 °C, 4h |
|         | <b>L8</b> <sup>8</sup><br>( <i>Angew. Chem. Int.</i><br>Ed. 2001, 40, 3408)               | /     | 319   | /    | / | 86.0 | 6.1 | S/C = 10000, L/Rh = 5<br>1 MPa, 120 °C, 16h |
| styrene | <b>pyTFBP</b><br>(This work)                                                              | 38200 | 38200 | 95.5 | / | 85.8 | 6.1 | S/C = 40000, L/Rh = 3<br>1 MPa, 100 °C, 1 h |
|         | <b>pyBP</b> <sup>3</sup><br>( <i>Chem. Eur. J.</i><br>2012, 18, 15288)                    | 6900  | /     | /    | / | 78.0 | 3.5 | S/C = 10000, L/Rh = 2<br>1 MPa, 100 °C, 3 h |
|         | <b>pyBN</b> <sup>9</sup><br>( <i>Appl.</i><br><i>Organometal. Chem.</i> 2013, 27,<br>474) | 1000  | /     | /    | / | 85.4 | 5.8 | S/C = 1000, L/Rh = 5<br>1 MPa, 90 °C, 1 h   |
|         | <b>L2</b> <sup>3</sup><br>( <i>Chem. Eur. J.</i><br>2012, 18, 15288)                      | 6000  | /     | /    | / | 77.5 | 3.4 | S/C = 10000, L/Rh = 2<br>1 MPa, 100 °C, 3 h |
|         | <b>L3</b> <sup>4</sup><br>( <i>Org. Lett.</i> 2013,<br>15, 1048)                          | /     | 360   | /    | / | 76.2 | 3.2 | S/C = 1000, L/Rh = 4<br>1 MPa, 0.5 h        |
|         | <b>L4</b> <sup>4</sup><br>( <i>Org. Lett.</i> 2013,<br>15, 1048)                          | /     | 470   | /    | / | 83.4 | 5.0 | S/C = 1000, L/Rh = 4<br>1 MPa, 0.5 h        |
|         | <b>L5</b> <sup>10</sup><br>( <i>Dalton Trans.</i><br>2013, 42, 137)                       | /     | /     | /    | / | 71   | 2.5 | S/C = 2000, L/Rh = 2<br>1 MPa, 80 °C        |

## 8. DFT Calculation Results for Ligand

All DFT calculations were performed at the B3LYP<sup>11-14</sup>-D3<sup>15</sup>/6-31G(d) level (6-31G(d) basis set for C, H, O, N, P) implemented in the Gaussian 16<sup>16</sup> packages in gas phase. Frequency calculations were performed to confirm that one imaginary frequency for all transition states. To save computational costs, “g09defaults” keyword was used in all calculations.

### Geometry optimization results for different conformations

To determine stable conformations for ligand, different conformations were calculated and the results are shown in Table S8-S10. And the most stable conformations of ligands were used as initial geometries for potential energy surface scan.

**Table S8.** Different conformations of pyBP, 3 kcal/mol less than the most stable conformation, with zero-energy corrected electronic energies and Gibbs free energies. Calculated at B3LYP-D3/6-31+G\* level in gas phase at 298.15K.

| Entry | Relative electronic energy (kcal/mol) | Relative Gibbs free energy (kcal/mol) | Absolute electronic energy (Hartree) | Absolute Gibbs free energy (Hartree) |
|-------|---------------------------------------|---------------------------------------|--------------------------------------|--------------------------------------|
| a-1   | 0.0                                   | 0.0                                   | -2133.157386                         | -2133.222682                         |
| a-2   | 0.0                                   | 0.0                                   | -2133.157385                         | -2133.222671                         |
| a-3   | 0.1                                   | 0.1                                   | -2133.157228                         | -2133.222520                         |
| a-4   | 2.2                                   | 0.9                                   | -2133.153931                         | -2133.221197                         |



|      |     |     |              |              |
|------|-----|-----|--------------|--------------|
| a-5  | 2.2 | 1.4 | -2133.153947 | -2133.220514 |
| a-6  | 1.8 | 1.9 | -2133.154571 | -2133.219713 |
| a-7  | 2.8 | 1.9 | -2133.152986 | -2133.219666 |
| a-8  | 3.8 | 2.0 | -2133.151307 | -2133.219444 |
| a-9  | 1.1 | 2.1 | -2133.155638 | -2133.219364 |
| a-10 | 1.1 | 2.1 | -2133.155636 | -2133.219359 |
| a-11 | 1.7 | 2.3 | -2133.154739 | -2133.218964 |
| a-12 | 1.7 | 2.4 | -2133.154622 | -2133.218818 |
| a-13 | 1.2 | 2.5 | -2133.155469 | -2133.218649 |
| a-14 | 1.2 | 2.5 | -2133.155466 | -2133.218639 |
| a-15 | 2.4 | 2.6 | -2133.153638 | -2133.218513 |
| a-16 | 3.6 | 2.7 | -2133.151690 | -2133.218453 |
| a-17 | 3.9 | 2.7 | -2133.151250 | -2133.218434 |
| a-18 | 2.5 | 3.0 | -2133.153414 | -2133.217897 |
| a-19 | 2.5 | 3.0 | -2133.153415 | -2133.217896 |

**Table S9.** Different conformations of pyBN, 3 kcal/mol less than the most stable conformation, with zero-energy corrected electronic energies and Gibbs free energies. Calculated at B3LYP-D3/6-31+G\* level in gas phase at 298.15K.

| Entry | Relative electronic energy (kcal/mol) | Relative Gibbs free energy (kcal/mol) | Absolute electronic energy (Hartree) | Absolute Gibbs free energy (Hartree) |
|-------|---------------------------------------|---------------------------------------|--------------------------------------|--------------------------------------|
| b-1   | 0.0                                   | 0.0                                   | -2440.358038                         | -2440.429591                         |
| b-2   | 0.1                                   | 0.2                                   | -2440.357914                         | -2440.429253                         |
| b-3   | 0.4                                   | 0.6                                   | -2440.357321                         | -2440.428633                         |
| b-4   | 1.1                                   | 1.2                                   | -2440.356279                         | -2440.427732                         |
| b-5   | 0.3                                   | 1.2                                   | -2440.357605                         | -2440.427662                         |
| b-6   | 0.7                                   | 1.3                                   | -2440.357002                         | -2440.427449                         |
| b-7   | 0.7                                   | 1.4                                   | -2440.356896                         | -2440.427417                         |
| b-8   | 3.0                                   | 1.5                                   | -2440.353258                         | -2440.427220                         |
| b-9   | 2.7                                   | 1.9                                   | -2440.353669                         | -2440.426570                         |
| b-10  | 1.7                                   | 2.0                                   | -2440.355373                         | -2440.426389                         |
| b-11  | 2.5                                   | 2.2                                   | -2440.353990                         | -2440.426134                         |
| b-12  | 4.7                                   | 2.3                                   | -2440.350508                         | -2440.425889                         |
| b-13  | 3.3                                   | 2.4                                   | -2440.352783                         | -2440.425697                         |
| b-14  | 2.9                                   | 2.6                                   | -2440.353433                         | -2440.425408                         |
| b-15  | 4.4                                   | 2.9                                   | -2440.351047                         | -2440.424976                         |
| b-16  | 3.7                                   | 2.9                                   | -2440.352151                         | -2440.424962                         |
| b-17  | 3.9                                   | 3.0                                   | -2440.351807                         | -2440.424828                         |

**Table S10.** Different conformations of pyTFBP, 3 kcal/mol less than the most stable conformation, with zero-energy corrected electronic energies and Gibbs free energies. Calculated at B3LYP-D3/6-31+G\* level in gas phase at 298.15K.

| Entry | Relative electronic energy (kcal/mol) | Relative Gibbs free energy (kcal/mol) | Absolute electronic energy (Hartree) | Absolute Gibbs free energy (Hartree) |
|-------|---------------------------------------|---------------------------------------|--------------------------------------|--------------------------------------|
| c-1   | 0.0                                   | 0.0                                   | -2747.944015                         | -2748.019444                         |
| c-2   | 0.5                                   | 0.3                                   | -2747.943146                         | -2748.018997                         |
| c-3   | 0.7                                   | 0.4                                   | -2747.942910                         | -2748.018771                         |
| c-4   | 0.7                                   | 1.1                                   | -2747.942894                         | -2748.017703                         |
| c-5   | 2.1                                   | 1.3                                   | -2747.940609                         | -2748.017343                         |
| c-6   | 1.2                                   | 1.4                                   | -2747.942077                         | -2748.017270                         |
| c-7   | 1.2                                   | 1.4                                   | -2747.942095                         | -2748.017147                         |
| c-8   | 2.3                                   | 1.6                                   | -2747.940352                         | -2748.016914                         |
| c-9   | 2.0                                   | 1.8                                   | -2747.940892                         | -2748.016652                         |
| c-10  | 2.9                                   | 1.8                                   | -2747.939426                         | -2748.016550                         |
| c-11  | 2.6                                   | 1.8                                   | -2747.939799                         | -2748.016533                         |
| c-12  | 3.9                                   | 1.8                                   | -2747.937780                         | -2748.016515                         |
| c-13  | 3.2                                   | 1.9                                   | -2747.938953                         | -2748.016417                         |
| c-14  | 3.6                                   | 2.1                                   | -2747.938351                         | -2748.016111                         |
| c-15  | 2.5                                   | 2.2                                   | -2747.939979                         | -2748.015901                         |
| c-16  | 2.5                                   | 2.2                                   | -2747.939976                         | -2748.015897                         |
| c-17  | 3.1                                   | 2.2                                   | -2747.939003                         | -2748.015865                         |
| c-18  | 3.1                                   | 2.4                                   | -2747.939015                         | -2748.015599                         |
| c-19  | 3.4                                   | 2.4                                   | -2747.938593                         | -2748.015564                         |
| c-20  | 3.4                                   | 2.4                                   | -2747.938588                         | -2748.015563                         |
| c-21  | 4.5                                   | 2.5                                   | -2747.936909                         | -2748.015479                         |
| c-22  | 3.3                                   | 2.5                                   | -2747.938823                         | -2748.015414                         |
| c-23  | 2.1                                   | 2.6                                   | -2747.940692                         | -2748.015347                         |
| c-24  | 2.5                                   | 2.6                                   | -2747.940002                         | -2748.015264                         |
| c-25  | 4.9                                   | 2.6                                   | -2747.936144                         | -2748.015249                         |
| c-26  | 2.7                                   | 2.6                                   | -2747.939775                         | -2748.015244                         |
| c-27  | 5.1                                   | 2.7                                   | -2747.935925                         | -2748.015217                         |
| c-28  | 5.0                                   | 2.7                                   | -2747.936072                         | -2748.015199                         |
| c-29  | 3.9                                   | 2.7                                   | -2747.937722                         | -2748.015116                         |
| c-30  | 3.8                                   | 2.7                                   | -2747.938000                         | -2748.015096                         |
| c-31  | 4.1                                   | 2.8                                   | -2747.937448                         | -2748.015031                         |
| c-32  | 5.5                                   | 2.8                                   | -2747.935310                         | -2748.014989                         |
| c-33  | 3.0                                   | 2.8                                   | -2747.939230                         | -2748.014908                         |
| c-34  | 3.5                                   | 2.9                                   | -2747.938401                         | -2748.014811                         |
| c-35  | 4.1                                   | 2.9                                   | -2747.937478                         | -2748.014775                         |
| c-36  | 4.1                                   | 3.0                                   | -2747.937499                         | -2748.014594                         |

**Results of relaxed potential energy surface scan around aryl axis with the most stable conformation.**

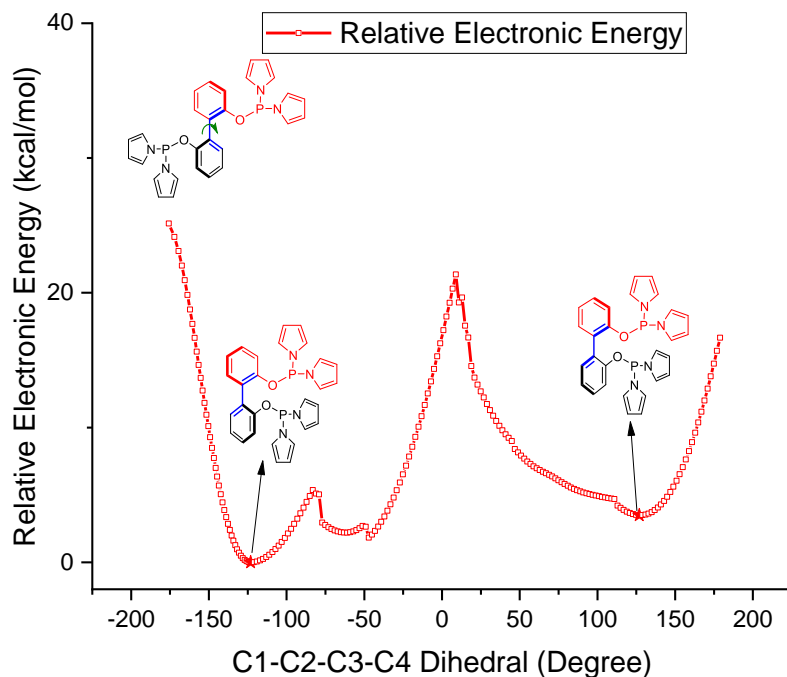

**Figure S24.** Results of relaxed potential energy surface scan around aryl axis with the most stable conformation of pyBP. with pyBP as the energy reference point. Calculated at B3LYP-D3/6-31+G\* level in gas phase at 298.15K.

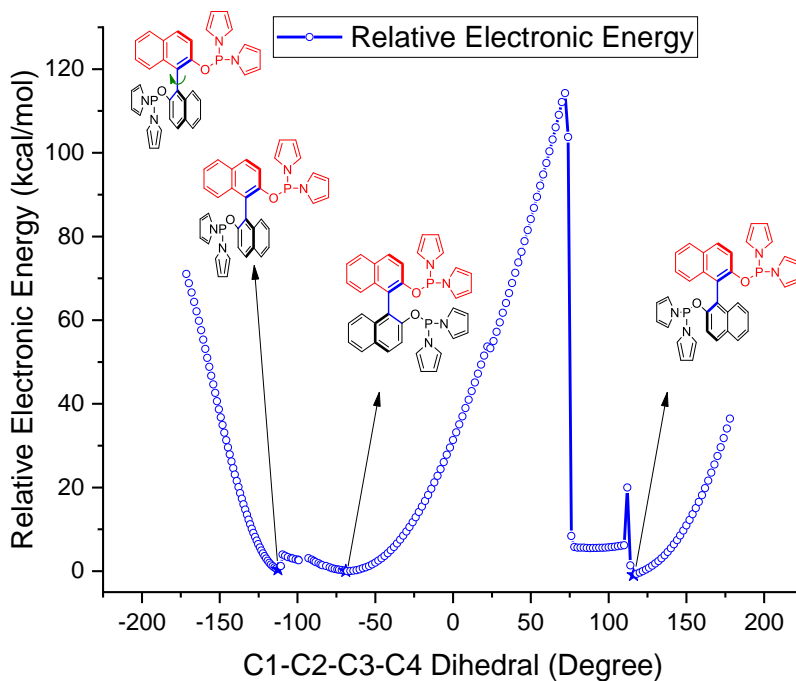

**Figure S25.** Results of relaxed potential energy surface scan around aryl axis with the most stable conformation of pyBN. with pyBN as the energy reference point. Calculated at B3LYP-D3/6-31+G\* level in gas phase at 298.15K.

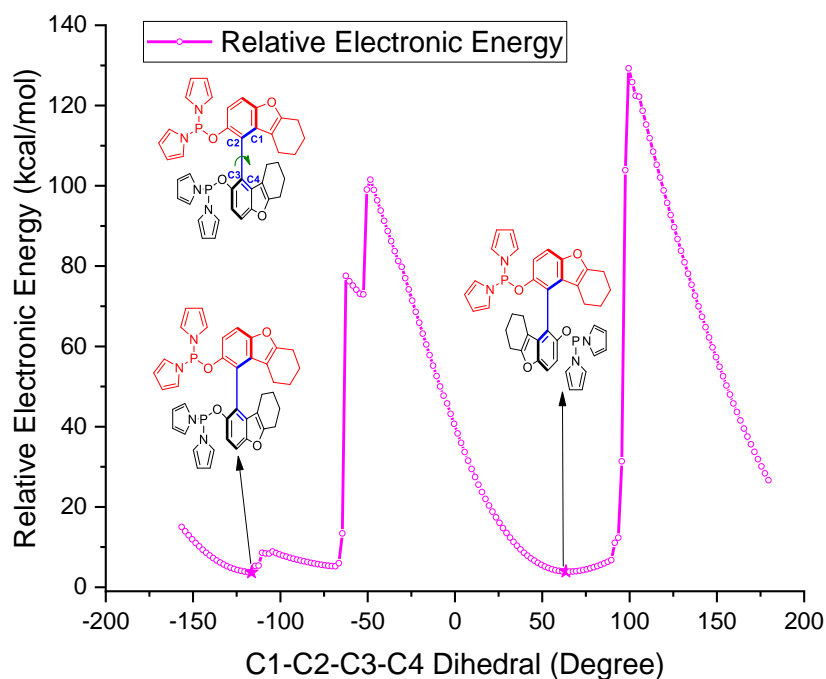

**Figure S26.** Results of relaxed potential energy surface scan around aryl axis with the most stable conformation of pyTFBP. with pyTFBP as the energy reference point. Calculated at B3LYP-D3/6-31+G\* level in gas phase at 298.15K.

## 9. DFT Calculation Results for Styrene Hydroformylation

All geometry optimizations were performed at the B3LYP<sup>11-14</sup>-D3<sup>15</sup>/6-31G(d)/SDD level (6-31G(d) basis set for C, H, O, N, P; and SDD effective core potential basis set for Rh) implemented in the Gaussian 16<sup>16</sup> packages in gas phase. Frequency calculations were performed to confirm that one imaginary frequency for all transition states, and that zero imaginary frequencies for all intermediates/reactants/products. To save computational costs, “g09defaults” keyword was used in all calculations.

**Table S11.** Reactants, products, intermediates and transition states for hydroformylation with the Rh catalyst, with zero-energy corrected electronic energies and Gibbs free energies. Calculated at B3LYP-D3/6-31+G\* level in gas phase at 298.15K.

| Entry               | Relative electronic energy (kcal/mol) | Relative Gibbs free energy (kcal/mol) | Absolute electronic energy (Hartree) | Absolute Gibbs free energy (Hartree) |
|---------------------|---------------------------------------|---------------------------------------|--------------------------------------|--------------------------------------|
| b-P                 | /                                     | /                                     | -424.034887                          | -424.069936                          |
| l-P                 | /                                     | /                                     | -424.034020                          | -424.069873                          |
| PhCHCH <sub>2</sub> | /                                     | /                                     | -309.517022                          | -309.548727                          |
| CO                  | /                                     | /                                     | -113.301879                          | -113.321017                          |
| H <sub>2</sub>      | /                                     | /                                     | -1.165337                            | -1.176825                            |
| IN-b-1              | -20.8                                 | -6.3                                  | -3282.092021                         | -3282.179868                         |
| TS-b-1              | -12.5                                 | 2.3                                   | -3282.078867                         | -3282.166245                         |
| IN-b-2              | -14.4                                 | -1.0                                  | -3282.081830                         | -3282.171414                         |

|        |       |       |              |              |
|--------|-------|-------|--------------|--------------|
| IN-b-3 | -41.8 | -16.8 | -3395.427369 | -3395.517628 |
| TS-b-2 | -33.9 | -8.9  | -3395.414793 | -3395.505094 |
| IN-b-4 | -44.9 | -19.7 | -3395.432263 | -3395.522281 |
| IN0    | -27.5 | -18.5 | -3085.887616 | -3085.971717 |
| IN1    | 0.0   | 0.0   | -2972.541856 | -2972.621155 |
| IN-l-1 | -22.6 | -7.7  | -3282.094927 | -3282.182137 |
| TS-l-1 | -14.2 | 0.9   | -3282.081496 | -3282.168429 |
| IN-l-2 | -21.2 | -7.3  | -3282.092697 | -3282.181569 |
| IN-l-3 | -43.7 | -20.3 | -3395.430390 | -3395.523187 |
| TS-l-2 | -28.7 | -4.5  | -3395.406441 | -3395.498111 |
| IN-l-4 | -38.4 | -14.1 | -3395.421967 | -3395.513327 |
| TS-l-3 | -36.0 | -6.6  | -3396.583525 | -3396.678320 |
| IN-l-5 | -45.6 | -14.3 | -3396.598689 | -3396.690549 |
| IN-l-6 | -42.4 | -11.4 | -3396.593723 | -3396.685932 |
| TS-l-4 | -34.1 | -3.5  | -3396.580358 | -3396.673301 |
| IN-l-7 | -45.9 | -17.3 | -3396.599197 | -3396.695258 |

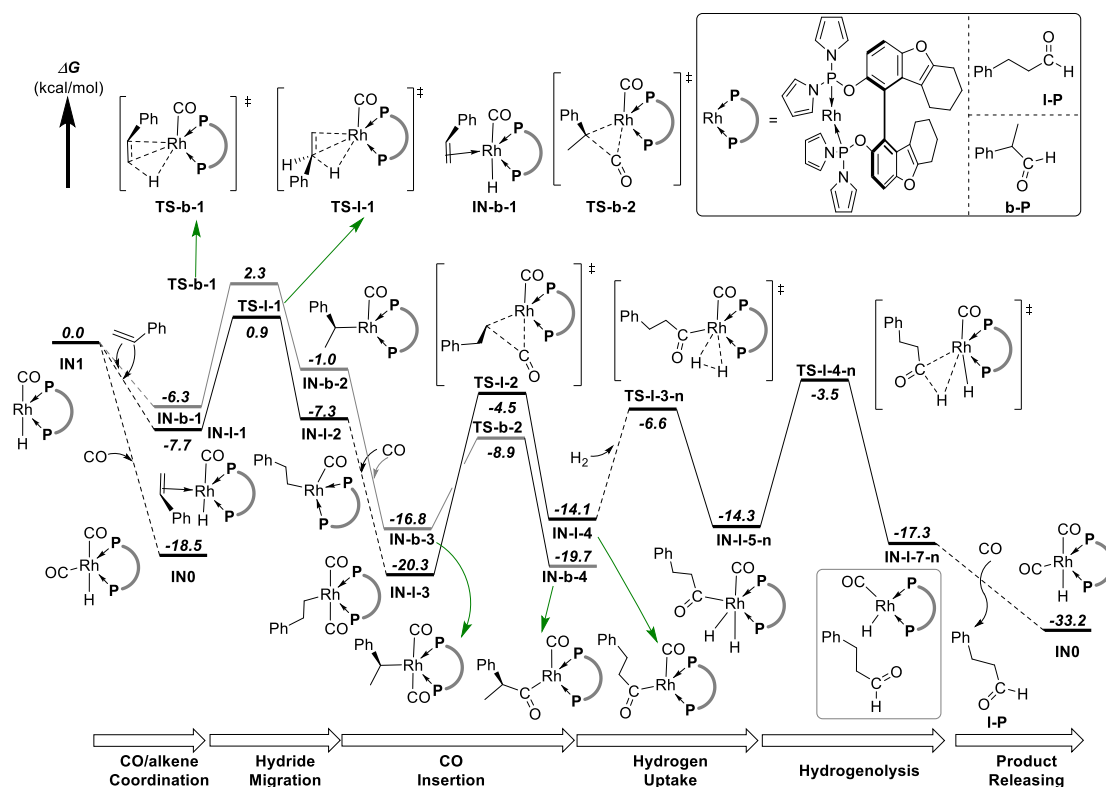

**Figure S27.** DFT calculation suggested free energy profiles for full reaction pathway for linear styrene hydroformylation to linear product (**I-P**) and partial reaction pathway for branched styrene hydroformylation to branched product (**b-P**), with the hydride migration step as the selectivity determination step. Calculated at B3LYP-D3/6-31+G\* level in gas phase at 298.15K.

IN0

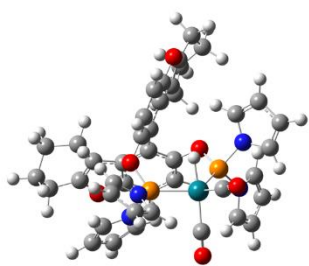

IN1

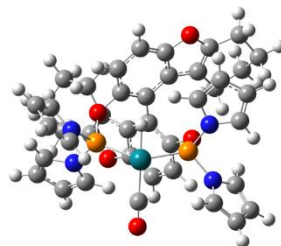

IN-b-1

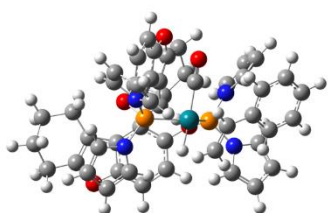

IN-b-2

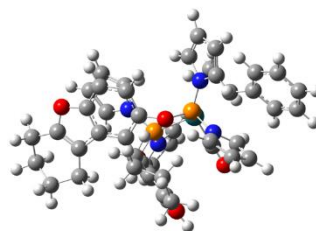

IN-b-3

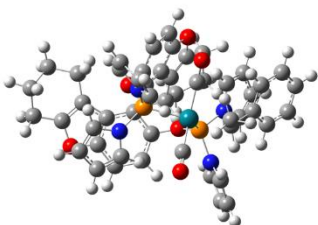

IN-b-4

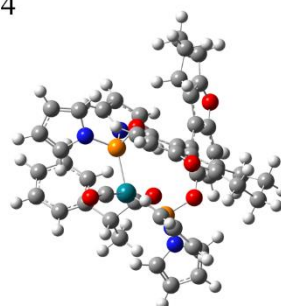

IN-l-1

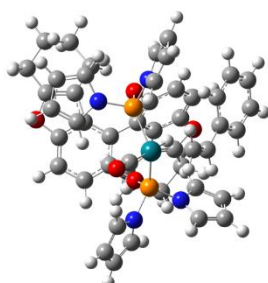

IN-l-2

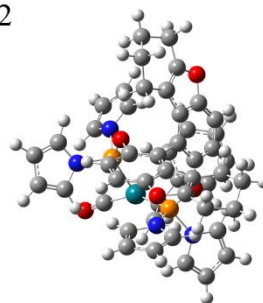

IN-1-3

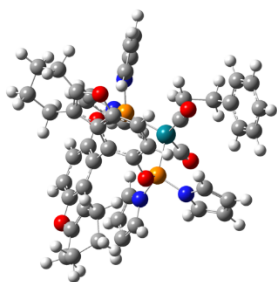

IN-1-4

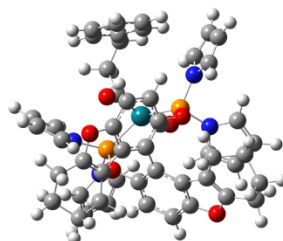

IN-1-5-n

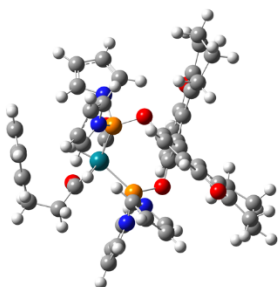

IN-1-6-n

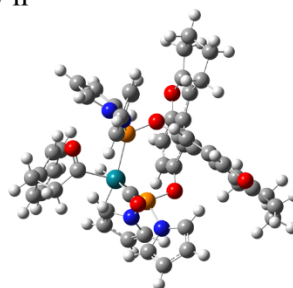

IN-1-7-n

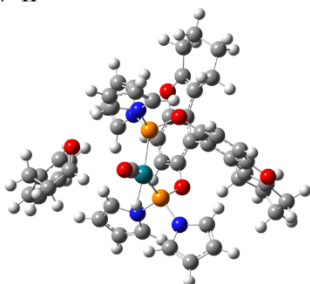

TS-b-1

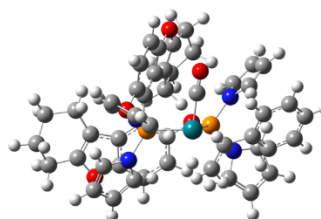

TS-b-2

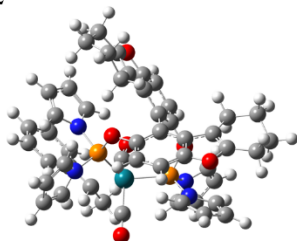

TS-1-1

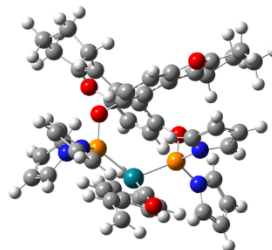

TS-1-2

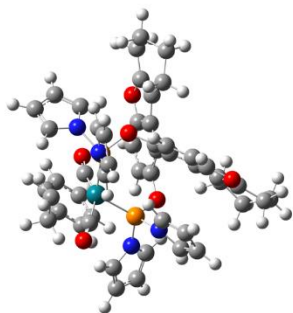

TS-1-3-n

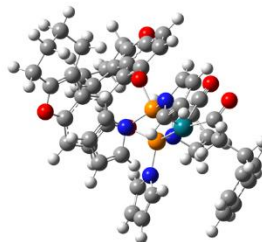

TS-1-4-n

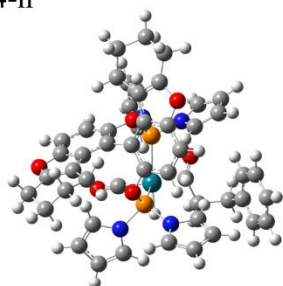

**Figure S28.** Structures of intermediates or transition states in Figure S27. White, grey, orange, blue, red, and cyan colors refer to hydrogen, carbon, phosphorus, nitrogen, oxygen, and rhodium, respectively.

**Table S12.** Imaginary frequency for transition states in the reaction pathway. Calculated at B3LYP-D3/6-31G(D) level in gas phase at 298.15K.

| Entry  | Imaginary frequency (cm <sup>-1</sup> ) |
|--------|-----------------------------------------|
| TS-b-1 | -745.0215i                              |
| TS-b-2 | -198.4894i                              |
| TS-1-1 | -581.9416i                              |
| TS-1-2 | -258.8206i                              |
| TS-1-3 | -839.1340i                              |
| TS-1-4 | -613.6967i                              |



## 10. References

- (1) H. Kelgtermans, L. Dobrzanska, L. Van Meervelt and W. Dehaen, *Tetrahedron*, 2011, **67**, 3685.
- (2) C. J. Cobley, C. H. Hanson, M. C. Lloyd, S. Simmonds and W. J. Peng, *Org. Proc. Res. Dev.* 2011, **15**, 284.
- (3) X. Jia, Z. Wang, C. Xia and K. Ding, *Chem. Eur. J.* 2012, **18**, 15288.
- (4) C. Chen, Y. Qiao, H. Geng and X. Zhang, *Org. Lett.*, 2013, **15**, 1048.
- (5) C. Chen, P. Li, Z. Hu, H. Wang, H. Zhu, X. Hu, Y. Wang, H. Lv and X. Zhang, *Org. Chem. Front.*, 2014, **1**, 947.
- (6) W. Liu, M. Yuan, H. Fu, H. Chen, R. Li and X. Li, *Chem. Lett.*, 2009, **38**, 596.
- (7) R. P. J. Bronger, J. P. Bermon, J. Herwig, P. C. J. Kamer and P. W. N. M. van Leeuwen, *Adv. Synth. Catal.*, 2004, **346**, 789.
- (8) H. Klein, R. Jackstell, K.-D. Wiese, C. Borgmann and M. Beller, *Angew. Chem., Int. Ed.*, 2001, **40**, 3408.
- (9) C. Zheng, M. Mo, H. Liang, X. Zheng, H. Fu, M. Yuan, R. Li and H. Chen, *Appl. Organometal. Chem.*, 2013, **27**, 474.
- (10) E. Boymans, M. Janssen, C. Müller, M. Lutz and D. Vogt, *Dalton Trans.*, 2013, **42**, 137.
- (11) A. D. Becke, *Phys. Rev. A.* 1988, **38**, 3098.
- (12) C. Lee, W. Yang and R. G. Parr, *Phys. Rev. B.* 1988, **37**, 785.
- (13) A. D. Becke, *J. Chem. Phys.* 1993, **98**, 1372.
- (14) P. J. Stephens, F. J. Devlin, C. F. Chabalowski and M. J. Frisch, *J. Phys. Chem.* 1994, **98**, 11623.
- (15) S. Grimme, J. Antony, S. Ehrlich and H. Krieg, *J. Chem. Phys.* 2010, **132**, 154104.
- (16) M. J. Frisch, G. W. Trucks, H. B. Schlegel, G. E. Scuseria, M. A. Robb, J. R. Cheeseman, G. Scalmani, V. Barone, G. A. Petersson, H. Nakatsuji, X. Li, M. Caricato, A. V. Marenich, J. Bloino, B. G. Janesko, R. Gomperts, B. Mennucci, H. P. Hratchian, J. V. Ortiz, A. F. Izmaylov, J. L. Sonnenberg, Williams, F. Ding, F. Lipparini, F. Egidi, J. Goings, B. Peng, A. Petrone, T. Henderson, D. Ranasinghe, V. G. Zakrzewski, J. Gao, N. Rega, G. Zheng, W. Liang, M. Hada, M. Ehara, K. Toyota, R. Fukuda, J. Hasegawa, M. Ishida, T. Nakajima, Y. Honda, O. Kitao, H. Nakai, T. Vreven, K. Throssell, Jr., J. A. Montgomery, J. E. Peralta, F. Ogliaro, M. J. Bearpark, J. J. Heyd, E. N. Brothers, K. N. Kudin, V. N. Staroverov, T. A. Keith, R. Kobayashi, J. Normand, K. Raghavachari, A. P. Rendell, J. C. Burant, S. S. Iyengar, J. Tomasi, M. Cossi, J. M. Millam, M. Klene, C. Adamo, R. Cammi, J. W. Ochterski, R. L. Martin, K. Morokuma, O. Farkas, J. B. Foresman and D. J. Fox, *Gaussian 16 Rev. B.01*. Wallingford, CT, 2016.
